# Supplementary material
Source: MDPI journal article supplement (https://www.mdpi.com/2073-4344/9/1/70)
Supplement: s1 [file s1]

## Supporting Information for

# Selective Synthesis of Furfuryl Alcohol from Biomass-Derived Furfural Using Immobilized Yeast Cells

Xue-Ying Zhang <sup>1</sup>, Zhong-Hua Xu <sup>1</sup>, Min-Hua Zong <sup>1</sup>, Chuan-Fu Wang <sup>2</sup> and Ning Li <sup>1,\*</sup>

<sup>1</sup> School of Food Science and Engineering, South China University of Technology, 381 Wushan Road, Guangzhou 510640, China; zxy1989318@126.com (Z.X.Y.); xzh199000@163.com (Z.H.X.); [btmhzong@scut.edu.cn](mailto:btmhzong@scut.edu.cn) (M.H.Z.)

<sup>2</sup> National Institute of Clean-and-Low-Carbon Energy, Future Science Park, Beijing 102211, China; wangchuanfu@nicenergy.com.

\* Correspondence: lining@scut.edu.cn (N.L.)

### Materials

Poly(vinyl alcohol) (PVA 1788, 87-89% hydrolyzed) was purchased from Aladdin Industrial Co. (Shanghai, China). Gelatin was purchased from Kermel Chemical Reagent Co. Ltd. (Tianjing, China). Dibutyl phthalate (>98.5%), and carrageenan were bought from Macklin Biochemical Co. Ltd. (Shanghai, China); Agar was from Biofroxx Co. (Germany).

### Preparation of gel beads

Agar beads were prepared according to a previous method [1], with some modifications. Agar of 2 g was dissolved in 100 mL deionized water under heating. Then warm agar solution (50°C) was dropped into the cooled dibutyl phthalate with gentle stirring for solidification. After solidification for 12 h at 4°C, agar beads were washed thoroughly with Tris-HCl buffer (100 mM, pH 8.0).

Preparation of gelatin beads was performed according to a previous method [2], with some modifications. Gelatin of 15 g was dissolved in 100 mL deionized water under heating. Then warm gelatin solution (50°C) was dropped into the cooled dibutyl phthalate with gentle stirring for solidification. After solidification for 1 h at 4°C, gelatin beads were transferred into 10% glutaraldehyde solution for crosslinking. After 1 h, the beads were washed thoroughly with Tris-HCl buffer (100 mM, pH 8.0).

Carrageenan beads were prepared according to He's method [3], with some modifications. Briefly, carrageenan of 3 g was dissolved in 100 mL 0.9% physiological saline under heating. Then warm solution (50°C) was dropped into the cooled dibutyl phthalate with gentle stirring for solidification. After solidification for 1 h at 4°C, gel beads were transferred into cooled 2% KCl solution (4°C), followed by incubation for 4 h. Then the beads were crosslinked by 5%

glutaraldehyde. After 1 h, the beads were washed thoroughly with 2% KCl solution. PVA beads were prepared according to a previous method [4], with some modifications. PVA of 5 g and sodium alginate of 0.25 g were dissolved in 50 mL deionized water under heating. Then warm solution (50°C) was dropped into a mixed solution of saturated boric acid and 100 mM calcium chloride with gentle stirring, followed by incubation of 2 h. The formed PVA beads were washed thoroughly with Tris-HCl buffer (100 mM, pH 8.0).

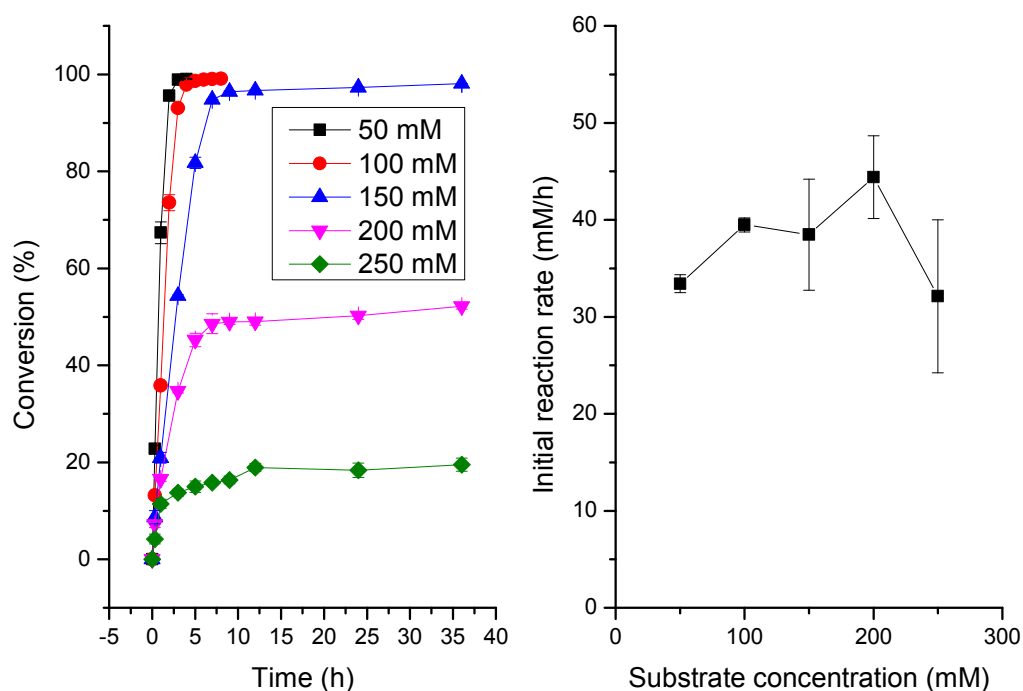

Figure S1 Time courses of substrate conversion in the reduction of furfural. The reaction conditions are the same as those in Figure 1d.

## References

1. Vassileva, A.; Burhan, N.; Beschkov, V.; Spasova, D.; Radoevska, S.; Ivanova, V.; Tonkova, A. Cyclodextrin glucanotransferase production by free and agar gel immobilized cells of *bacillus circulans* atcc 21783. *Process Biochem.* **2003**, *38*, 1585-1591.
2. Aparecida de Assis, S.; Ferreira, B.S.; Fernandes, P.; Guaglianoni, D.G.; Cabral, J.M.S.; Oliveira, O.M.M.F. Gelatin-immobilized pectinmethylesterase for production of low methoxyl pectin. *Food Chem.* **2004**, *86*, 333-337.
3. He, Y.-C.; Xu, J.-H.; Su, J.-H.; Zhou, L. Bioproduction of glycolic acid from glycolonitrile with a new bacterial isolate of *alcaligenes* sp. Ecu0401. *Appl. Biochem. Biotechnol.* **2010**, *160*, 1428-1440.
4. Takei, T.; Ikeda, K.; Ijima, H.; Kawakami, K. Fabrication of poly(vinyl alcohol) hydrogel beads crosslinked using sodium sulfate for microorganism immobilization. *Process Biochem.* **2011**, *46*, 566-571.
